# Supplementary material for: Oviposition Site-Selection by Bactrocera dorsalis Is Mediated through an Innate Recognition Template Tuned to γ-Octalactone
Source: PubMed Central journal article supplement (PMC3900432; doi:10.1371/journal.pone.0085764), 2014-01-23
Supplement: pone.0085764.s002.pdf [file pone.0085764.s002.pdf]

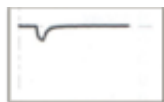

0.005

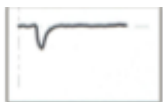

0.01

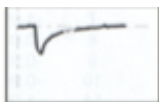

0.05

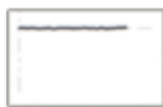

Control (Hexane)

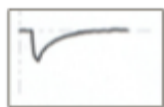

0.1

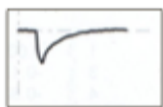

0.5

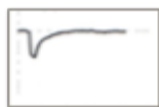

1

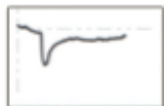

10

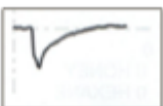

50

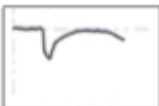

100
